# Supplementary material for: Tandem copper and photoredox catalysis in photocatalytic alkene difunctionalization reactions
Source: PubMed Central journal article supplement (PMC6369989; doi:10.3762/bjoc.15.30), 2019-02-05
Supplement: Beilstein_J_Org_Chem-15-351-s001.pdf [file Beilstein_J_Org_Chem-15-351-s001.pdf]

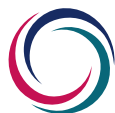

## Supporting Information

for

### **Tandem copper and photoredox catalysis in photocatalytic alkene difunctionalization reactions**

Nicholas L. Reed, Madeline I. Herman, Vladimir P. Miltchev and Tehshik P. Yoon

*Beilstein J. Org. Chem.* **2019**, *15*, 351–356. [doi:10.3762/bjoc.15.30](https://doi.org/10.3762/bjoc.15.30)

### **Full experimental details for all reactions**

## Table of Contents

|      |                                         |    |
|------|-----------------------------------------|----|
| I.   | General information                     | S1 |
| II.  | Synthesis of $\text{Ag}_2\text{CO}_3$   | S1 |
| III. | Photocatalytic oxyamination of styrenes | S2 |
| V.   | Photocatalytic diamination of styrenes  | S6 |
| VI.  | References                              | S7 |

### I. General information

All reactions were performed under an  $\text{N}_2$  atmosphere unless otherwise noted. All glassware was dried in an oven at  $120\text{ }^\circ\text{C}$  for at least 2 h prior to use and allowed to cool in a desiccator cabinet. Reactions carried out below  $0\text{ }^\circ\text{C}$  employed an acetone/dry ice bath or a cryocool equipped with an acetone bath. MeCN, THF,  $\text{Et}_2\text{O}$ , DMF, toluene, and  $\text{CH}_2\text{Cl}_2$  were purified by elution through alumina as described by Grubbs [1]. Compounds **1**, **S1**, **S2**, **S3**, **S4**, **S5**, **S6**, **S10**, **S11**, and **S12** were synthesized as previously described by Yoon and co-workers [2]. **S7** was synthesized according to the method of Nicewicz and co-workers [3]. **S8** was synthesized according to the method of Xu and co-workers [4]. All other chemicals were purchased from commercial suppliers and used as received.

Flash column chromatography was performed with normal phase  $\text{SiO}_2$  (Sigma-Aldrich or Macherey-Nagel,  $60\text{ \AA}$  pore size, 230–400 mesh, 40–63  $\mu\text{m}$  particle size) according to the method of Still [5]. Reactions were monitored by thin-layer chromatography (Silicycle, 250  $\mu\text{m}$  thickness), and visualization was accomplished with a 254 nm UV light or by staining with  $\text{KMnO}_4$  solution (3.0 g of  $\text{KMnO}_4$  and 20.0 g of  $\text{K}_2\text{CO}_3$  in 5 mL of 5% aq. NaOH and 300 mL  $\text{H}_2\text{O}$ ).

The identity and purity of all products was verified by  $^1\text{H}$  and  $^{13}\text{C}$  NMR. The spectrometers used for this work are supported by the NIH (S10 OD012245) and a generous gift from Paul J. and Margaret M. Bender.

### II. Synthesis of $\text{Ag}_2\text{CO}_3$

**Silver carbonate ( $\text{Ag}_2\text{CO}_3$ ).** Prepared using a modification of the procedure described by Dai and coworkers [6]. A solution of  $\text{AgNO}_3$  (1.62 g, 9.53 mmol) in  $\text{H}_2\text{O}$  (19 mL) was treated dropwise with a solution of  $\text{Na}_2\text{CO}_3$  (0.501 g, 4.73 mmol) in  $\text{H}_2\text{O}$  (5.7 mL) over

10 min and the resulting solution was stirred at ambient temperature for 30 min. The precipitated solids were filtered, washed with H<sub>2</sub>O (100 mL) and acetone (100 mL), and dried under aspirator pressure for 2 h while shielded from light to give Ag<sub>2</sub>CO<sub>3</sub> (1.196 g, 4.337 mmol, 92%) as a light yellow powder.

Note: Drying Ag<sub>2</sub>CO<sub>3</sub> obtained using this procedure in vacuo results in the formation of a brown powder of inferior quality.

### III. Photocatalytic oxyamination of styrenes

**General procedure for intramolecular oxyamination:** A Schlenk flask containing the oxyamination substrate (1 equiv), Ag<sub>2</sub>CO<sub>3</sub> (1 equiv), Cu(TFA)<sub>2</sub>·xH<sub>2</sub>O (0.30 equiv), and TPPT (**3**, 0.025 equiv, 2.5 mol %) in CH<sub>2</sub>Cl<sub>2</sub> (0.1 M) was degassed (freeze-pump-thaw, 3 cycles of 5 min each), and the resulting mixture was irradiated with a 15 W blue LED flood lamp for 2–4 h at ambient temperature. The reaction mixture was then diluted with EtOAc, eluted through a thin pad of SiO<sub>2</sub>, and concentrated under reduced pressure. The residue was purified by chromatography on SiO<sub>2</sub> to afford pure product.

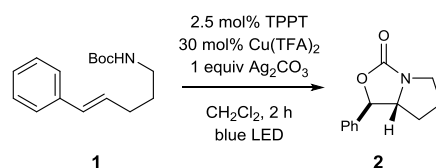

**1-Phenyltetrahydro-1*H*,3*H*-pyrrolo[1,2-*c*]oxazol-3-one** (Table 1, **2**). Synthesized according to the general procedure using **1** (0.092 g, 0.35 mmol), Ag<sub>2</sub>CO<sub>3</sub> (0.096 g, 0.35 mmol), Cu(TFA)<sub>2</sub>·xH<sub>2</sub>O (0.031 g, 0.11 mmol), and TPPT (0.0035 g, 0.0088 mmol) and irradiated for 2 h. After chromatography on SiO<sub>2</sub> (35% EtOAc in hexanes), **2** was isolated as a clear, colorless oil which solidified upon standing (0.050 g, 0.25 mmol, 70%). All spectral data were in agreement with previously reported values [3].

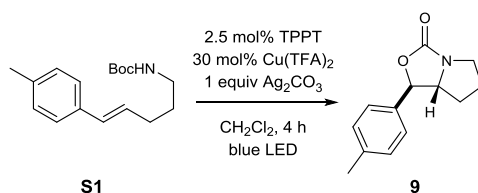

**1-(*p*-Tolyl)tetrahydro-1*H*,3*H*-pyrrolo[1,2-*c*]oxazol-3-one** (Figure 2, **9**). Synthesized according to the general procedure using **S1** (0.096 g, 0.35 mmol), Ag<sub>2</sub>CO<sub>3</sub> (0.096 g, 0.35 mmol), Cu(TFA)<sub>2</sub>·xH<sub>2</sub>O (0.030 g, 0.11 mmol), and TPPT (0.0035 g, 0.0088 mmol) and irradiated for 4 h. After chromatography on SiO<sub>2</sub> (40% EtOAc in hexanes), **9** was

isolated as a clear, colorless oil which solidified upon standing (0.050 g, 0.23 mmol, 66%). All spectral data were in agreement with previously reported values [3].

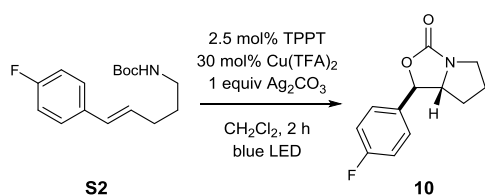

**1-(4-Fluorophenyl)tetrahydro-1H,3H-pyrrolo[1,2-c]oxazol-3-one** (Figure 2, **10**). Synthesized according to the general procedure using **S2** (0.097 g, 0.35 mmol), Ag<sub>2</sub>CO<sub>3</sub> (0.131 g, 0.350 mmol), Cu(TFA)<sub>2</sub>·xH<sub>2</sub>O (0.030 g, 0.10 mmol), and TPPT (0.0034 g, 0.0087 mmol) and irradiated for 2 h. After chromatography on SiO<sub>2</sub> (60% Et<sub>2</sub>O in hexanes), **10** was isolated as a clear, colorless oil that solidified upon standing (0.043 g, 0.19 mmol, 55%). All spectral data were in agreement with previously reported values [3].

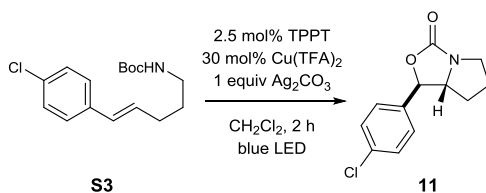

**1-(4-Chlorophenyl)tetrahydro-1H,3H-pyrrolo[1,2-c]oxazol-3-one** (Figure 2, **11**). Synthesized according to the general procedure using **S3** (0.131 g, 0.350 mmol), Ag<sub>2</sub>CO<sub>3</sub> (0.131 g, 0.350 mmol), Cu(TFA)<sub>2</sub>·xH<sub>2</sub>O (0.030 g, 0.10 mmol), and TPPT (0.0034 g, 0.0087 mmol) and irradiated for 2 h. After chromatography on SiO<sub>2</sub> (60% Et<sub>2</sub>O in hexanes), **11** was isolated as a white solid (0.055 g, 0.23 mmol, 66%). All spectral data were in agreement with previously reported values [3].

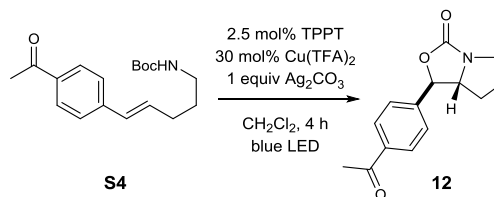

**1-(4-Acetylphenyl)tetrahydro-1H,3H-pyrrolo[1,2-c]oxazol-3-one** (Figure 2, **12**). Synthesized according to the general procedure using **S4** (0.107 g, 0.353 mmol), Ag<sub>2</sub>CO<sub>3</sub> (0.096 g, 0.35 mmol), Cu(TFA)<sub>2</sub>·xH<sub>2</sub>O (0.031 g, 0.11 mmol), and TPPT (0.0035 g, 0.0088 mmol) and irradiated for 4 h. After chromatography on SiO<sub>2</sub> (55% EtOAc in

hexanes), **12** was isolated as a white solid (0.046 g, 0.19 mmol, 53%). All spectral data were in agreement with previously reported values [3].

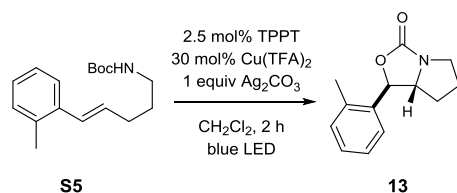

**1-(*o*-Tolyl)tetrahydro-1*H*,3*H*-pyrrolo[1,2-*c*]oxazol-3-one** (Figure 2, **13**). Synthesized according to the general procedure using **S5** (0.096 g, 0.35 mmol), Ag<sub>2</sub>CO<sub>3</sub> (0.131 g, 0.350 mmol), Cu(TFA)<sub>2</sub>·xH<sub>2</sub>O (0.030 g, 0.10 mmol), and TPPT (0.0034 g, 0.0087 mmol) and irradiated for 2 h. After chromatography on SiO<sub>2</sub> (70% Et<sub>2</sub>O in hexanes), **13** was isolated as a pale-yellow oil which solidified upon standing (0.048 g, 0.22 mmol, 63%). All spectral data were in agreement with previously reported values [3].

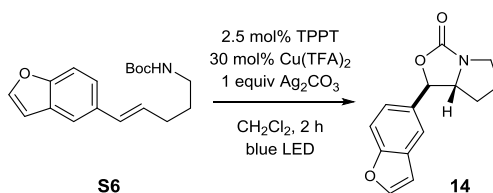

**1-(Benzofuran-5-yl)tetrahydro-1*H*,3*H*-pyrrolo[1,2-*c*]oxazol-3-one** (Figure 2, **14**). Synthesized according to the general procedure using **S6** (0.105 g, 0.350 mmol), Ag<sub>2</sub>CO<sub>3</sub> (0.131 mg, 0.350 mmol), Cu(TFA)<sub>2</sub>·xH<sub>2</sub>O (0.030 g, 0.10 mmol), and TPPT (0.0035 g, 0.0088 mmol) and irradiated for 2 h. After chromatography on SiO<sub>2</sub> (70% Et<sub>2</sub>O in hexanes), **14** was isolated as a light green oil (0.045 g, 0.19 mmol, 53%). All spectral data were in agreement with previously reported values [3].

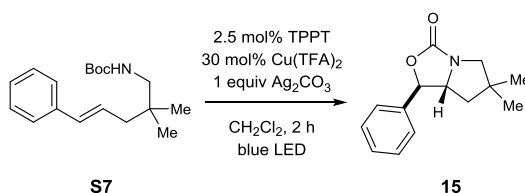

**6,6-Dimethyl-1-phenyltetrahydro-1*H*,3*H*-pyrrolo[1,2-*c*]oxazol-3-one** (Figure 2, **15**). Synthesized according to the general procedure using **S7** (0.101 g, 0.349 mmol), Ag<sub>2</sub>CO<sub>3</sub> (0.131 g, 0.348 mmol), Cu(TFA)<sub>2</sub>·xH<sub>2</sub>O (0.030 g, 0.11 mmol), and TPPT (0.0035 g, 0.0088 mmol) and irradiated for 2 h. After chromatography on SiO<sub>2</sub> (35% EtOAc in hexanes), **15** was isolated as a white solid (0.0461 g, 0.199 mmol, 57%). All spectral data were in agreement with previously reported values [3].

**General procedure for intermolecular oxyamination:** A Schlenk flask containing alkene (1 equiv),  $\text{Ag}_2\text{CO}_3$  (1 equiv),  $\text{Cu}(\text{TFA})_2 \cdot x\text{H}_2\text{O}$  (0.30 equiv), *tert*-butyl carbamate (3 equiv), and TPPT (**3**, 0.025 equiv, 2.5 mol %) in  $\text{CH}_2\text{Cl}_2$  (0.1 M) was degassed (freeze-pump-thaw, 3 cycles of 5 min each), and the resulting mixture was irradiated with a 15 W blue LED flood lamp for 18–48 h at ambient temperature. The reaction mixture was then diluted with EtOAc, eluted through a thin pad of  $\text{SiO}_2$ , and concentrated under reduced pressure. The residue was purified by chromatography on  $\text{SiO}_2$  to afford pure product.

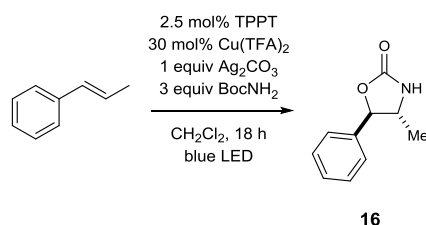

**4-Methyl-5-phenyloxazolidin-2-one** (Figure 2, **16**). Synthesized according to the general procedure using  $\beta$ -methylstyrene (0.045 mL, 0.35 mmol),  $\text{Ag}_2\text{CO}_3$  (0.098 g, 0.36 mmol),  $\text{Cu}(\text{TFA})_2 \cdot x\text{H}_2\text{O}$  (0.033 g, 0.11 mmol),  $\text{BocNH}_2$  (0.123 g, 1.05 mmol), and TPPT (0.0035 g, 0.0088 mmol) and irradiated for 18 h. After chromatography on  $\text{SiO}_2$  (50–60% EtOAc in hexanes), **16** was isolated as a clear, pale yellow oil (0.026 g, 0.15 mmol, 42%, 3:1 *trans:cis*). All spectral data were in agreement with previously reported values [7].

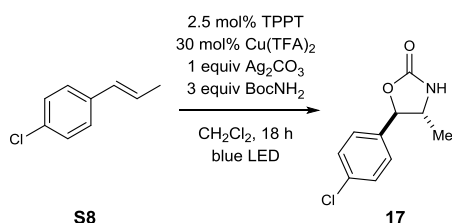

**5-(4-Chlorophenyl)-4-methyloxazolidin-2-one** (Figure 2, **17**). Synthesized according to the general procedure using **S8** (0.053 g, 0.35 mmol),  $\text{Ag}_2\text{CO}_3$  (0.097 g, 0.35 mmol),  $\text{Cu}(\text{TFA})_2 \cdot x\text{H}_2\text{O}$  (0.032 g, 0.11 mmol),  $\text{BocNH}_2$  (0.125 g, 1.07 mmol), and TPPT (0.0035 g, 0.0088 mmol) and irradiated for 18 h. After chromatography on  $\text{SiO}_2$  (60% EtOAc in hexanes), **17** was isolated as a yellow oil (0.034 g, 0.16 mmol, 46%, 10:1 *trans:cis*). All spectral data were in agreement with previously reported values [8].

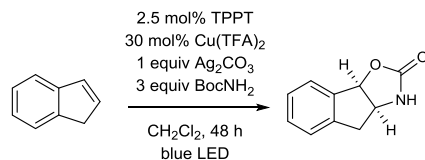

18

**3,3a,4,8b-Tetrahydro-2H-indeno[2,1-d]oxazol-2-one** (Figure 2, **18**). Synthesized according to the general procedure using indene (0.041 mL, 0.35 mmol), Ag<sub>2</sub>CO<sub>3</sub> (0.097 g, 0.35 mmol), Cu(TFA)<sub>2</sub>·xH<sub>2</sub>O (0.031 g, 0.11 mmol), BocNH<sub>2</sub> (0.124 g, 1.06 mmol), and TPPT (0.0035 g, 0.0088 mmol) and irradiated for 48 h. After chromatography on SiO<sub>2</sub> (60% EtOAc in hexanes), **18** was isolated as a light brown solid (0.014 g, 0.080 mmol, 23%, >20:1 d.r.). All spectral data were in agreement with previously reported values [9].

#### IV. Photocatalytic diamination of styrenes

**General procedure for intramolecular diamination of styrenes:** A Schlenk flask containing the diamination substrate (1 equiv), Ag<sub>2</sub>CO<sub>3</sub> (1 equiv), Cu(OAc)<sub>2</sub>·xH<sub>2</sub>O (0.30 equiv), and MesAcrMe<sup>+</sup> (**6**, 0.025 equiv, 2.5 mol %) in CH<sub>2</sub>Cl<sub>2</sub> (0.1 M) was degassed (freeze-pump-thaw, 4 cycles of 5 min each), and the resulting mixture was irradiated with a 15 W blue LED flood lamp for 24–36 h at ambient temperature. The reaction mixture was then diluted with EtOAc, eluted through a thin pad of SiO<sub>2</sub>, and concentrated under reduced pressure. The residue was purified by chromatography on SiO<sub>2</sub> to afford pure product.

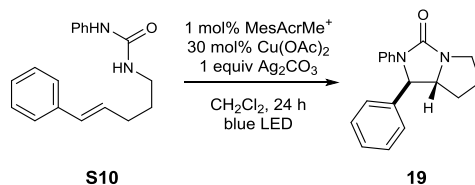

**1,2-Diphenylhexahydro-3H-pyrrolo[1,2-c]imidazol-3-one** (Figure 2, **19**). Synthesized according to the general procedure using **S10** (0.098 g, 0.35 mmol), Ag<sub>2</sub>CO<sub>3</sub> (0.131 g, 0.350 mmol), Cu(OAc)<sub>2</sub>·xH<sub>2</sub>O (0.019 g, 0.11 mmol), and MesAcrMe<sup>+</sup> (0.0035 g, 0.0088 mmol) and irradiated for 24 h. After chromatography on SiO<sub>2</sub> (0–10% Et<sub>2</sub>O in CH<sub>2</sub>Cl<sub>2</sub>), **19** was isolated as a white solid (0.038 g, 0.14 mmol, 40%). All spectral data were in agreement with previously reported values [3].

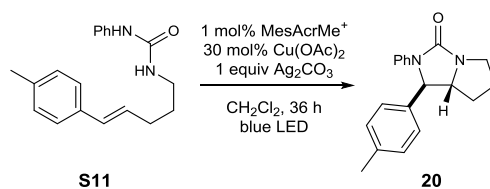

**2-Phenyl-1-(*p*-tolyl)hexahydro-3*H*-pyrrolo[1,2-*c*]imidazol-3-one** (Figure 2, **20**). Synthesized according to the general procedure using **S11** (0.103 g, 0.350 mmol), Ag<sub>2</sub>CO<sub>3</sub> (0.131 g, 0.350 mmol), Cu(OAc)<sub>2</sub>·xH<sub>2</sub>O (0.030 g, 0.10 mmol), and MesAcrMe<sup>+</sup> (0.0035 g, 0.0087 mmol) and irradiated for 36 h. After chromatography on SiO<sub>2</sub> (0–5% Et<sub>2</sub>O in CH<sub>2</sub>Cl<sub>2</sub>), **20** was isolated as a white solid (0.050 g, 0.21 mmol, 50%). All spectral data were in agreement with previously reported values [3].

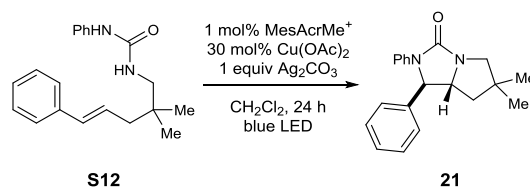

**6,6-Dimethyl-1,2-diphenylhexahydro-3*H*-pyrrolo[1,2-*c*]imidazol-3-one** (Figure 2, **21**). Synthesized according to the general procedure using **S12** (0.108 g, 0.350 mmol), Ag<sub>2</sub>CO<sub>3</sub> (0.131 g, 0.350 mmol), Cu(OAc)<sub>2</sub>·xH<sub>2</sub>O (0.030 g, 0.11 mmol), and MesAcrMe<sup>+</sup> (0.0035 g, 0.0087 mmol) and irradiated for 24 h. After chromatography on SiO<sub>2</sub> (0–5% Et<sub>2</sub>O in CH<sub>2</sub>Cl<sub>2</sub>), **21** was isolated as a white solid (0.030 g, 0.097 mmol, 28%). All spectral data were in agreement with previously reported values [3].

## V. References

- <sup>1</sup> A. B. Pangborn, M. A. Giardello, R. H. Grubbs, R. K. Rosen, F. J. Timmers, *Organometallics* **1996**, *15*, 1518–1520.
- <sup>2</sup> Reed, N. L.; Herman, M. I.; Miltchev, V. P.; Yoon, T. P. *Org. Lett.* **2018**, *20*, 7345–7350.
- <sup>3</sup> J. D. Griffin, C. L. Cavanaugh, D. A. Nicewicz, *Angew. Chem. Int. Ed.* **2017**, *56*, 2097–2100.
- <sup>4</sup> W. L. Yu, J. Q. Chen, Y. L. Wei, Z. Y. Wang, P. F. Xu, *Chem. Commun.* **2018**, *54*, 1948–1951.
- <sup>5</sup> W. C. Still, M. Kahn, A. Mitra, *J. Org. Chem.* **1978**, *43*, 2923–2925.
- <sup>6</sup> Xu, C.; Liu, Y.; Huang, B.; Li, H.; Qin, X.; Zhang, X.; Dai, Y. *Applied Surface Science* **2011**, *257*, 8732–8736.
- <sup>7</sup> Schulze, M. *Synth. Commun.* **2010**, *40*, 1461–1476.
- <sup>8</sup> H. U. Vora, J. R. Moncecchi, O. Epstein, T. Rovis, *Org. Lett.* **2008**, *73*, 9727–9731.
- <sup>9</sup> C. F. Huebner, E. M. Donoghue, C. J. Novak, L. Dorfman, E. Wenkert, *J. Org. Chem.* **1970**, *35*, 1149–1154.
